# Supplementary material
Source: publisher figshare collection journal article supplement (https://tandf.figshare.com/ndownloader/files/14221202)
Supplement: Supplementary file 1 [file 14221202]

Supplementary Table 1

Major (%) and trace element (ppm) data for the [Jurassic](http://dict.cnki.net/dict_result.aspx?searchword=侏罗&tjType=sentence&style=&t=middle+jurassic)-Carboniferous igneous rocks within the Xar Moron suture zone

| Samples | XM-1 | XM-2 | XM-3 | XM-4 | XM-5 | XM-6 | XM-7 | XM-8 | XM-9 |
| --- | --- | --- | --- | --- | --- | --- | --- | --- | --- |
| Lithology | [Adamellite](http://dict.cnki.net/dict_result.aspx?searchword=二长花岗岩&tjType=sentence&style=&t=adamellite)  granite | Orthoclase granite | [Quartz diorit](http://dict.cnki.net/dict_result.aspx?searchword=石英闪长岩&tjType=sentence&style=&t=quartz+diorite)e | Orthoclase granite | Orthoclase granite | Orthoclase granite | Orthoclase granite | [Adamellite](http://dict.cnki.net/dict_result.aspx?searchword=二长花岗岩&tjType=sentence&style=&t=adamellite)  granite | Orthoclase granite |
| Age | [Carboniferous](http://dict.cnki.net/dict_result.aspx?searchword=石炭系&tjType=sentence&style=&t=carboniferous) | | | [Permian](http://dict.cnki.net/dict_result.aspx?searchword=二叠系&tjType=sentence&style=&t=permian) | | | | | [Jurassic](http://dict.cnki.net/dict_result.aspx?searchword=侏罗&tjType=sentence&style=&t=middle+jurassic) |
| SiO2 | 73.4 | 74.59 | 70.4 | 65.02 | 65.14 | 65.3 | 76.36 | 71.78 | 73.59 |
| Al2O3 | 13.06 | 12.68 | 13.16 | 17.11 | 16.81 | 15.14 | 13.06 | 14.63 | 13.35 |
| Fe2O3 | 1.71 | 1.72 | 1.21 | 2.84 | 4.53 | 2.39 | 0.59 | 1.96 | 1.57 |
| FeO | 0.64 | 0.69 | 3.64 | 1.41 | 0.71 | 2.51 | 0.24 | 1.55 | 0.86 |
| CaO | 0.43 | 0.23 | 1.25 | 2.28 | 1.42 | 1.04 | 0.03 | 0.79 | 1.17 |
| MgO | 1.45 | 0.84 | 1.55 | 1.28 | 1.2 | 1.36 | 0.15 | 0.29 | 0.37 |
| K2O | 3.72 | 4.97 | 2.75 | 3.16 | 3.82 | 3.15 | 4.51 | 3.95 | 4.53 |
| Na2O | 3.05 | 3.62 | 3.05 | 4.46 | 3.42 | 7.72 | 3.2 | 3.25 | 4.02 |
| TiO2 | 0.23 | 0.21 | 0.74 | 0.58 | 0.68 | 0.58 | 0.22 | 0.35 | 0.21 |
| P2O5 | 0.12 | 0.03 | 0.14 | 0.16 | 0.16 | 0.17 | 0.17 | 0.16 | 0.09 |
| MnO | 0.11 | 0.04 | 0.08 | 0.09 | 0.07 | 0.03 | 0.18 | 0.12 | 0.07 |
| LOI | 2.02 | 0.37 | 2.02 | 1.33 | 0.73 | 0.54 | 0.72 | 0.98 | 0.05 |
| Total | 99.94 | 99.99 | 99.99 | 99.72 | 98.69 | 99.93 | 99.43 | 99.81 | 99.88 |
| ANK | 1.44 | 1.12 | 1.65 | 1.59 | 1.72 | 0.94 | 1.29 | 1.52 | 1.16 |
| ACNK | 1.33 | 1.08 | 1.28 | 1.15 | 1.36 | 0.84 | 1.28 | 1.32 | 0.98 |
| σ | 1.51 | 2.34 | 1.23 | 2.64 | 2.37 | 5.3 | 1.78 | 1.8 | 2.39 |
| Fe* | 0.51 | 0.65 | 0.41 | 0.67 | 0.77 | 0.61 | 0.78 | 0.86 | 0.79 |
| Mg# | 0.63 | 0.49 | 0.72 | 0.47 | 0.34 | 0.53 | 0.34 | 0.23 | 0.32 |
| Li | 6.319 | 4.061 | 18.33 | 21.77 | 19.33 | 22.73 | 7.156 | 2.728 | 12.41 |
| Be | 2.193 | 2.16 | 0.8016 | 1.288 | 1.658 | 2.058 | 0.5878 | 0.7439 | 1.915 |
| B | 1.012 | 1.824 | 3.627 | 11.39 | 19.79 | 1.893 | 6.157 | 5.381 | 1.775 |
| Sc | 2.819 | 3.398 | 7.506 | 4.616 | 6.841 | 6.036 | 12.99 | 4.136 | 2.798 |
| Ti | 644.3 | 902.3 | 3555 | 2808 | 3140 | 2732 | 5183 | 781.3 | 1047 |
| V | -11.36 | -0.7587 | 113.2 | 46.57 | 67.72 | 39.97 | 117.6 | 8.264 | -1.383 |
| Cr | 2055 | 689 | 503.3 | 530.7 | 480 | 459.3 | 1525 | 413.4 | 948.4 |
| Mn | 403.1 | 225.5 | 486.3 | 541.3 | 378.1 | 189 | 1053 | 128.2 | 441.4 |
| Co | 2.254 | 1.136 | 6.45 | 8.319 | 6.642 | 3.673 | 14.16 | 1.187 | 1.856 |
| Ni | 23.78 | 8.718 | 19.66 | 26.89 | 20.63 | 17.47 | 27.8 | 6.051 | 9.679 |
| Cu | 8.349 | 5.224 | 25.35 | 14.33 | 12.92 | 5.384 | 34.22 | 9.006 | 4.347 |
| Zn | 38.82 | 23.36 | 93.52 | 109 | 112 | 43.88 | 104.8 | 21.41 | 39.57 |
| Ga | 16.16 | 14.97 | 14.7 | 17.46 | 17.11 | 17.73 | 14.34 | 11.89 | 14.74 |
| Ge | 4.53 | 3.38 | 5.985 | 4.882 | 5.45 | 5.25 | 10.38 | 3.238 | 4.121 |
| As | 7.844 | 16.03 | 2.394 | 2.08 | 1.746 | 1.454 | 7.173 | 4.033 | 1.687 |
| Se | 1.793 | 1.376 | 1.917 | 1.178 | 1.418 | 1.341 | 1.613 | 1.948 | 1.548 |
| Rb | 257.4 | 187.3 | 76.29 | 67.14 | 116.3 | 71.87 | 19.37 | 151.3 | 177 |
| Sr | 73.19 | 45.32 | 115.9 | 317 | 208.5 | 157.9 | 286.6 | 73.41 | 145.5 |
| Y | 26.05 | 21.49 | 31.49 | 14.23 | 18.34 | 12.86 | 24.43 | 40.19 | 26.74 |
| Zr | 194.5 | 230.7 | 246.3 | 205 | 188.9 | 208.6 | 118.9 | 218.5 | 245.8 |
| Nb | 22.72 | 11.23 | 12.8 | 7.324 | 8.482 | 6.951 | 4.616 | 7.102 | 16.88 |
| Mo | 3.043 | 0.831 | 0.4275 | 0.6504 | 0.9982 | 0.3225 | 2.874 | 0.3943 | 1.069 |
| Ag | 0.4817 | 0.5318 | 0.5555 | 0.5131 | 0.5825 | 0.5588 | 0.2833 | 0.4829 | 0.4953 |
| Cd | 1.252 | 1.518 | 1.636 | 1.519 | 2.182 | 1.463 | 0.8255 | 1.516 | 1.422 |
| Sn | 2.899 | 1.569 | 2.776 | 2.695 | 4.637 | 12.41 | 6.189 | 2.349 | 2.828 |
| Sb | 0.8392 | 0.9841 | 0.8001 | 1.59 | 2.029 | 1.319 | 1.37 | 1.09 | 0.795 |
| Cs | 6.976 | 3.582 | 7.782 | 27.09 | 30.11 | 29.94 | 0.8538 | 3.212 | 5.825 |
| Ba | 111.1 | 422.4 | 312.6 | 735.8 | 674.3 | 371.7 | 737.8 | 524.3 | 355.2 |
| La | 46.13 | 27.41 | 35.87 | 19.97 | 26.07 | 18.89 | 17.29 | 30.73 | 50.24 |
| Ce | 98.78 | 51.77 | 80.82 | 39.16 | 48.64 | 38.43 | 37.74 | 63.55 | 98.37 |
| Pr | 10.7 | 6.581 | 9.156 | 5.014 | 6.17 | 4.609 | 4.825 | 6.805 | 10.73 |
| Nd | 37.25 | 24.01 | 34.68 | 19.17 | 23.39 | 17.45 | 20.41 | 23.65 | 35.73 |
| Sm | 6.58 | 4.444 | 6.902 | 3.801 | 4.63 | 3.295 | 4.873 | 4.814 | 6.058 |
| Eu | 0.1728 | 0.619 | 0.9107 | 1.36 | 1.187 | 0.8278 | 1.467 | 0.5219 | 0.5259 |
| Gd | 5.886 | 4.162 | 6.617 | 3.794 | 4.311 | 3.024 | 5.113 | 5.363 | 5.253 |
| Tb | 0.8949 | 0.6771 | 1.075 | 0.5657 | 0.6368 | 0.4668 | 0.8104 | 1.021 | 0.8338 |
| Dy | 5.096 | 3.981 | 6.114 | 3.045 | 3.736 | 2.589 | 4.809 | 6.503 | 4.748 |
| Ho | 1.054 | 0.8338 | 1.255 | 0.5945 | 0.7654 | 0.5399 | 1.002 | 1.51 | 0.9636 |
| Er | 3.027 | 2.408 | 3.526 | 1.696 | 2.126 | 1.546 | 2.814 | 4.626 | 2.905 |
| Tm | 0.4826 | 0.3882 | 0.5223 | 0.2398 | 0.3138 | 0.2336 | 0.429 | 0.762 | 0.4828 |
| Yb | 3.17 | 2.57 | 3.527 | 1.543 | 2.069 | 1.584 | 2.727 | 5.244 | 3.148 |
| Lu | 0.5101 | 0.4256 | 0.5465 | 0.2425 | 0.3294 | 0.2563 | 0.4427 | 0.8509 | 0.5307 |
| Hf | 6.732 | 7.278 | 7.125 | 5.716 | 5.299 | 5.992 | 3.466 | 8.275 | 8.083 |
| Ta | 1.956 | 1.025 | 1.1 | 0.5517 | 0.6562 | 0.5829 | 0.3207 | 0.7775 | 1.894 |
| W | 15.43 | 4.069 | 1.027 | 1.548 | 2.36 | 2.412 | 0.8295 | 0.4068 | 0.7451 |
| Tl | 1.242 | 0.9055 | 2.032 | 1.478 | 1.423 | 1.659 | 0.1838 | 0.6901 | 0.8511 |
| Pb | 30.76 | 12.56 | 14.79 | 22.97 | 16.66 | 12.65 | 13.12 | 16.64 | 19.07 |
| Bi | 0.3674 | 0.2507 | 0.3673 | 0.3311 | 0.5027 | 0.05436 | 0.04874 | 0.03129 | 0.0716 |
| Th | 26.02 | 20.42 | 14.83 | 5.525 | 7.013 | 5.065 | 3.049 | 26.56 | 30 |
| U | 3.673 | 1.289 | 3.619 | 1.241 | 1.637 | 1.364 | 1.069 | 3.49 | 3.149 |
| Y+Nb | 48.77 | 32.72 | 44.29 | 21.554 | 26.822 | 19.811 | 29.046 | 47.292 | 43.62 |
| Eu/Eu* | 0.08 | 0.04 | 0.08 | 0.06 | 0.06 | 0.07 | 0.04 | 0.07 | 0.07 |
| ΣREE | 219.73 | 130.28 | 191.52 | 100.20 | 124.37 | 93.74 | 104.75 | 155.95 | 220.52 |
| Dy/Yb | 1.61 | 1.55 | 1.73 | 1.97 | 1.81 | 1.63 | 1.76 | 1.24 | 1.51 |
| (Th/Ta)N | 6.42 | 9.61 | 6.50 | 4.83 | 5.16 | 4.19 | 4.59 | 16.48 | 7.64 |
| (Y/Nb)N | 0.18 | 0.30 | 0.39 | 0.30 | 0.34 | 0.29 | 0.83 | 0.89 | 0.25 |
| (La/Yb)N | 4.43 | 3.24 | 3.09 | 3.94 | 3.83 | 3.63 | 1.93 | 1.78 | 4.86 |

**Note:** LOI =Loss on ignition; Fe*=FeOT/(FeOT+MgO); Mg#=molar 100Mg/(Mg+Fe); A/CNK=Al2O3/(CaO+Na2O+K2O);the Litman index σ=[ω(K2O+Na2O)]2/[ω(SiO2)-43]; Eu/Eu*={(Eu/0.0735)/[(Sm/0.1950)+(Gd/0.259)]/2}
